# Supplementary material for: Immobilization of a water insoluble iridium complex with organosilica nanoparticles for electrochemiluminescence sensing
Source: Royal Society of Chemistry journal article supplement (doi:10.1039/c4ay00805g), 2014-01-01
Supplement: c4ay00805g1.pdf [file c4ay00805g1.pdf]

## Supporting information

### Immobilization of water insoluble iridium complex with organosilica nanoparticles for electrochemiluminescence sensing

Yanli Liu, and Qijun Song\*

The Key Laboratory of Food Colloids and Biotechnology, Ministry of Education, School of Chemical and Material Engineering, Jiangnan University, Wuxi 214122, China

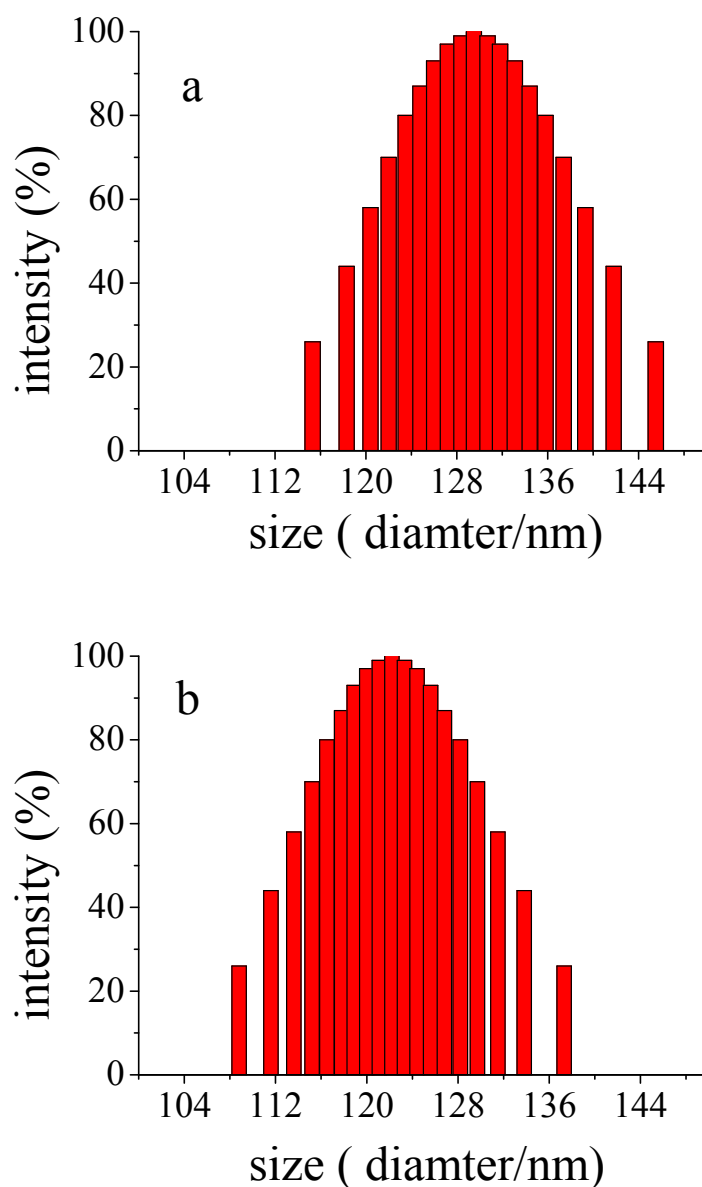

**Fig. S1** Dynamic Light Scattering measurement of Ir(pq)<sub>2</sub>(acac)@OSiNPs

(4ORM2E4C), **a**: organic silicon nanoparticles loaded with Iridium complex; **b**: organic silicon nanoparticles unloaded with Iridium complex.

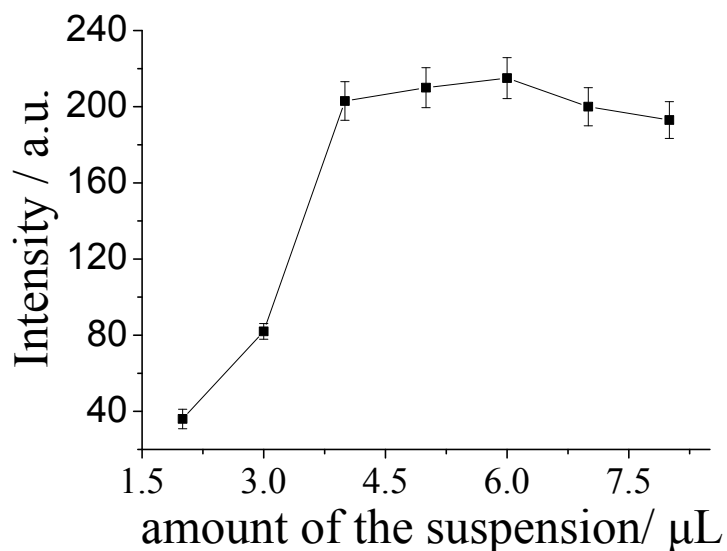

**Fig. S2** Influence of the amount of  $\text{Ir}(\text{pq})_2(\text{acac})@\text{OSiNPs}$  application on the electrode to the ECL response. The experiments were carried out in phosphate buffer solution ( pH 8.0 ), containing  $10 \mu\text{mol} \cdot \text{L}^{-1}$  DBAE.

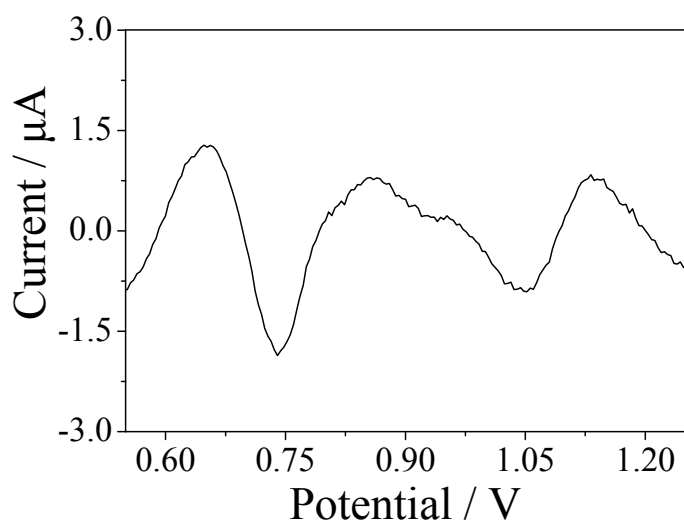

**Fig. S3** The DPV of the  $\text{Ir}(\text{pq})_2(\text{acac})@\text{OSiNPs}$  (3ORM2P4C) modified electrode in the phosphate buffer solution of DBAE. The concentration of DBAE was

$1.0 \times 10^{-4} \text{ mol} \cdot \text{L}^{-1}$ .

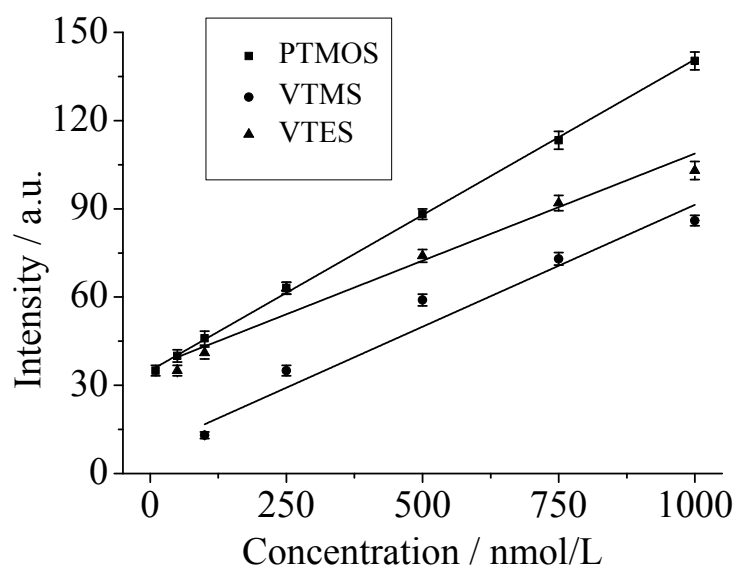

**Fig. S4** The linear calibration curves obtained with the  $\text{Ir}(\text{pq})_2(\text{acac})@\text{OSiNPs}$  modified electrode by using different organosilane precursors.
